# Supplementary material for: River Runoff Modelling and Hydrological Drought Assessment Based on High-Resolution Brightness Temperatures in Mainland China
Source: MDPI journal article supplement (doi:10.3390/w13172429), 2021-09-03
Supplement: s1 [file s1]

Article

# River Runoff Modelling and Hydrological Drought Assessment based on High-resolution Brightness Temperatures in Mainland China

Xing Qu <sup>1,2</sup>, Ziyue Zeng<sup>1,2,\*</sup>, Zhe Yuan <sup>1,2,\*</sup>, Junjun Huo <sup>1,2</sup>, Yongqiang Wang <sup>1,2</sup> and Jijun Xu <sup>1,2</sup>

<sup>1</sup> Changjiang River Scientific Research Institute of Changjiang Water Resources Commission, Wuhan 430010, China; qxky1910@163.com (X.Q.); coconeth@163.com (J.H.); wangyongqiang1022@126.com (Y.W.); xujj07@163.com (J.X.)

<sup>2</sup> Hubei Provincial Key Laboratory of Basin Water Resources and Ecological Environment, Wuhan 430010, China

\* Correspondence: zengzy@mail.crsri.cn (Z.Z.); yuanzhe\_0116@126.com (Z.Y.); Tel.: +86 151-0278-5427(Z.Z.).

**Citation:** Qu, X.; Zeng, Z.; Yuan, Z.; Huo, J.; Wang, Y.; Xu, J. River Runoff Modelling and Hydrological Drought Assessment based on High-Resolution Brightness Temperatures in Mainland China. *Water* **2021**, *13*, 2429. <https://doi.org/10.3390/w13172429>

Academic Editors: Xushu Wu, Jiabo Yin and Shengzhi Huang

Received: 16 July 2021

Accepted: 1 September 2021

Published: 3 September 2021

**Publisher's Note:** MDPI stays neutral with regard to jurisdictional claims in published maps and institutional affiliations.

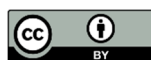

**Copyright:** © 2021 by the authors. Licensee MDPI, Basel, Switzerland. This article is an open access article distributed under the terms and conditions of the Creative Commons Attribution (CC BY) license (<http://creativecommons.org/licenses/by/4.0/>).

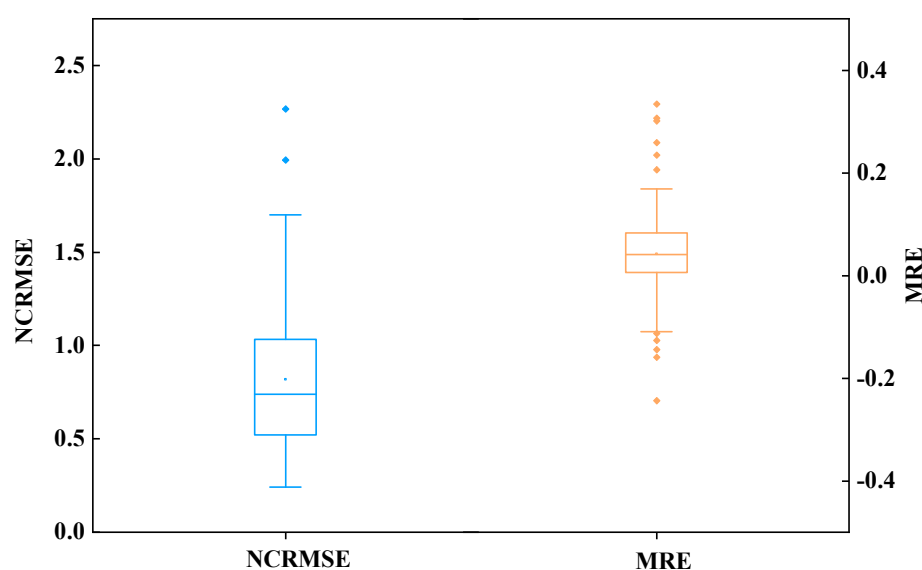

Figure S1. Box plots of normalized centered root-mean-square error (NCRMSE) and mean relative error (MRE) for the 79 stations.

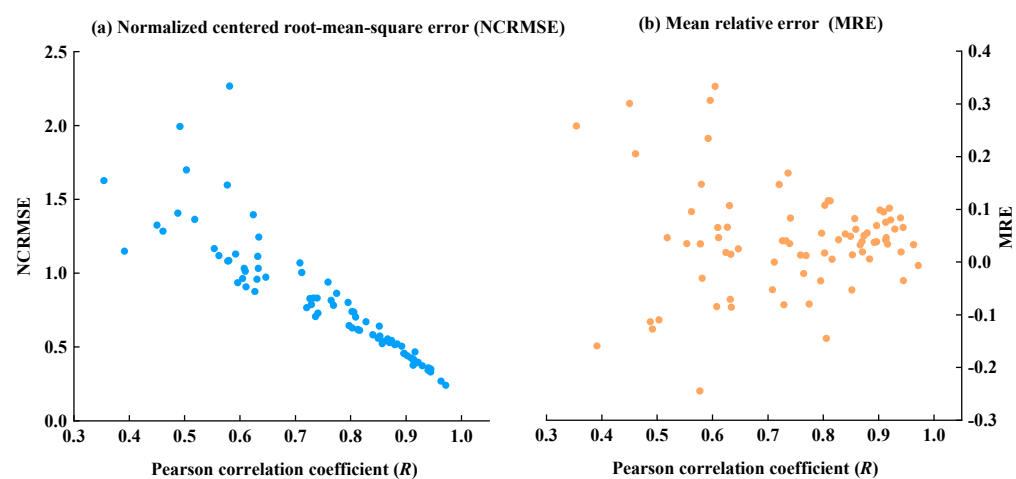

Figure S2. (a) NCRMSE vs.  $R$  and (b) MRE vs.  $R$  for the 79 stations.

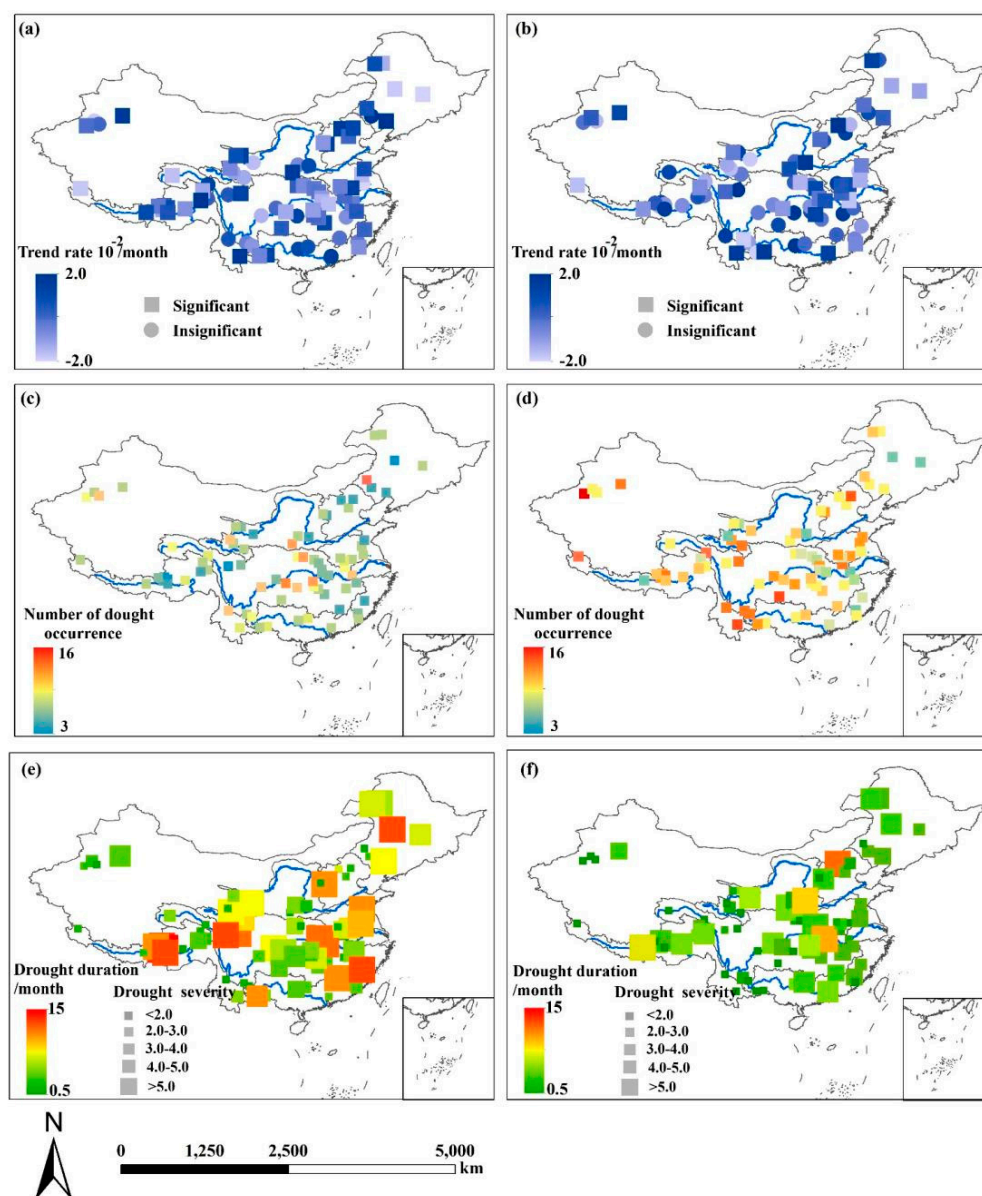

Figure S3. Comparisons of the standardized runoff index on a 3-month scale (SRI-3) trends, drought event frequency, distribution of drought duration (Dd) and drought severity (Ds) for the 79 stations from 1996–2008 based on simulated and observed runoff, respectively: (a) the SRI-3 trends and significance generated by observed runoff; (b) the SRI-3 trends and significance generated by simulated runoff; (c) the number of drought events calculated based on observed runoff; (d) the number of drought events calculated based on simulated runoff; (e) distribution of Dd and Ds calculated based on observed runoff; (f) distribution of Dd and Ds calculated based on simulated runoff.

Table S1. Multiple regression analysis of the influencing factors.

| Factors          | Standardization coefficient | P-value |
|------------------|-----------------------------|---------|
| Elevation        | 0.84                        | 0.00    |
| Climate type     | 0.37                        | 0.03    |
| Mean discharge   | -0.27                       | 0.02    |
| River width      | -0.21                       | 0.89    |
| LULC             | -0.63                       | 0.59    |
| Vegetation cover | -0.04                       | 0.72    |
| Catchment area   | -0.07                       | 0.64    |
